# Supplementary material for: Centrosomal Localization of the Psoriasis Candidate Gene Product, CCHCR1, Supports a Role in Cytoskeletal Organization
Source: PLoS One. 2012 Nov 26;7(11):e49920. doi: 10.1371/journal.pone.0049920 (PMC3506594; doi:10.1371/journal.pone.0049920)
Supplement: Table S2 — Sequences of primers used in the present study. (XLSX) [file pone.0049920.s009.xlsx]

## Sheet: PCR primers
Sequences of primers used in the present study. The reference sequences of CCHCR1 transcripts 1 and 3 are NM_001105564.1 and NM_019052.3, respectively.
Oligo-Sense	Oligo-Antisense	Application
GGATCCGAGGGTCTAGCCCTGCATGTG	GGCTCTAGATTCTGTCTCCAGCCATCTATG	Cloning CCHCR1 Iso1 Nt
CATAGATGGCTGGAGACAGAATCTAGAGCC	TGGATCCGCGCTGCTCATCTGGGGATT	Cloning CCHCR1 Iso1 Ct
	GGATCCTTAGCTGCTCATCTGGGGATT	Cloning CCHCR1 Iso1 Ct
GGATTCCCAAGGTCTTGGG	ATCAGCCCAGTGGAACCTG	Cloning CCHCR1 Iso1 Nt
GCATGGAAGCTAAGGGGATA	ATCAGCCCAGTGGAACCTG	RT-PCR CCHCR1 variant 1
AAAGCGCAGTAGGGGGCT	TTGCAGCTGCCGAACGATCAC	RT-PCR CCHCR1 variant 3
CTGCCGCCCAGCTTCCCAGC	GGGGACAGCTCTCCTGGCGCA	qPCR CCHCR1
GGCCAGGAGCAGCAGGGACCA	AGCCCAGTGGAACCTGAAGGTGGA	qPCR CCHCR1 variant 1
GCAGTAGGGGGCTCTCGCGGT	TTGCAGCTGCCGAACGATCAC	qPCR CCHCR1 variant 3
GTCGCCAGCCGAGCCACATC	GGTGACCAGGCGCCCAATACG	qPCR GAPDH
TCAAACCCAGAATTGTTCTCCTTAT	CCTGAATCCCTTTAGAATAGGGTAGA	qPCR TBP
Abbreviations: Nt, N-terminal; Ct, C-terminal

## Sheet: shRNA primers
Sequences of oligos used for the preparation of stable shRNA cell lines.
CCHCR1-shRNA
GATCCCGGGATGTTTCCAGTGACATTCAAGAGATGTCACTGGAAACATCCCGCGC	Oligo-Sense
TCGAGCGCGGGATGTTTCCAGTGACATCTCTTGAATGTCACTGGAAACATCCCGG	Oligo-Antisense
scramble-shRNA
GATCCGTTCGACGGGACTTACTGATTCAAGAGATCAGTAAGTCCCGTCGAACCGC	Oligo-Sense
TCGAGCGGTTCGACGGGACTTACTGATCTCTTGAATCAGTAAGTCCCGTCGAACG	Oligo-Antisense
